# Supplementary material for: Evening transitions of the atmospheric boundary layer: characterization, case studies and WRF simulations
Source: Copernicus journal article supplement (doi:10.5194/asr-8-39-2012), 2012-03-26
Supplement: Supplementary file 1 [file Supplemental Information 1.pdf › Supplemental Information 1.pdf]

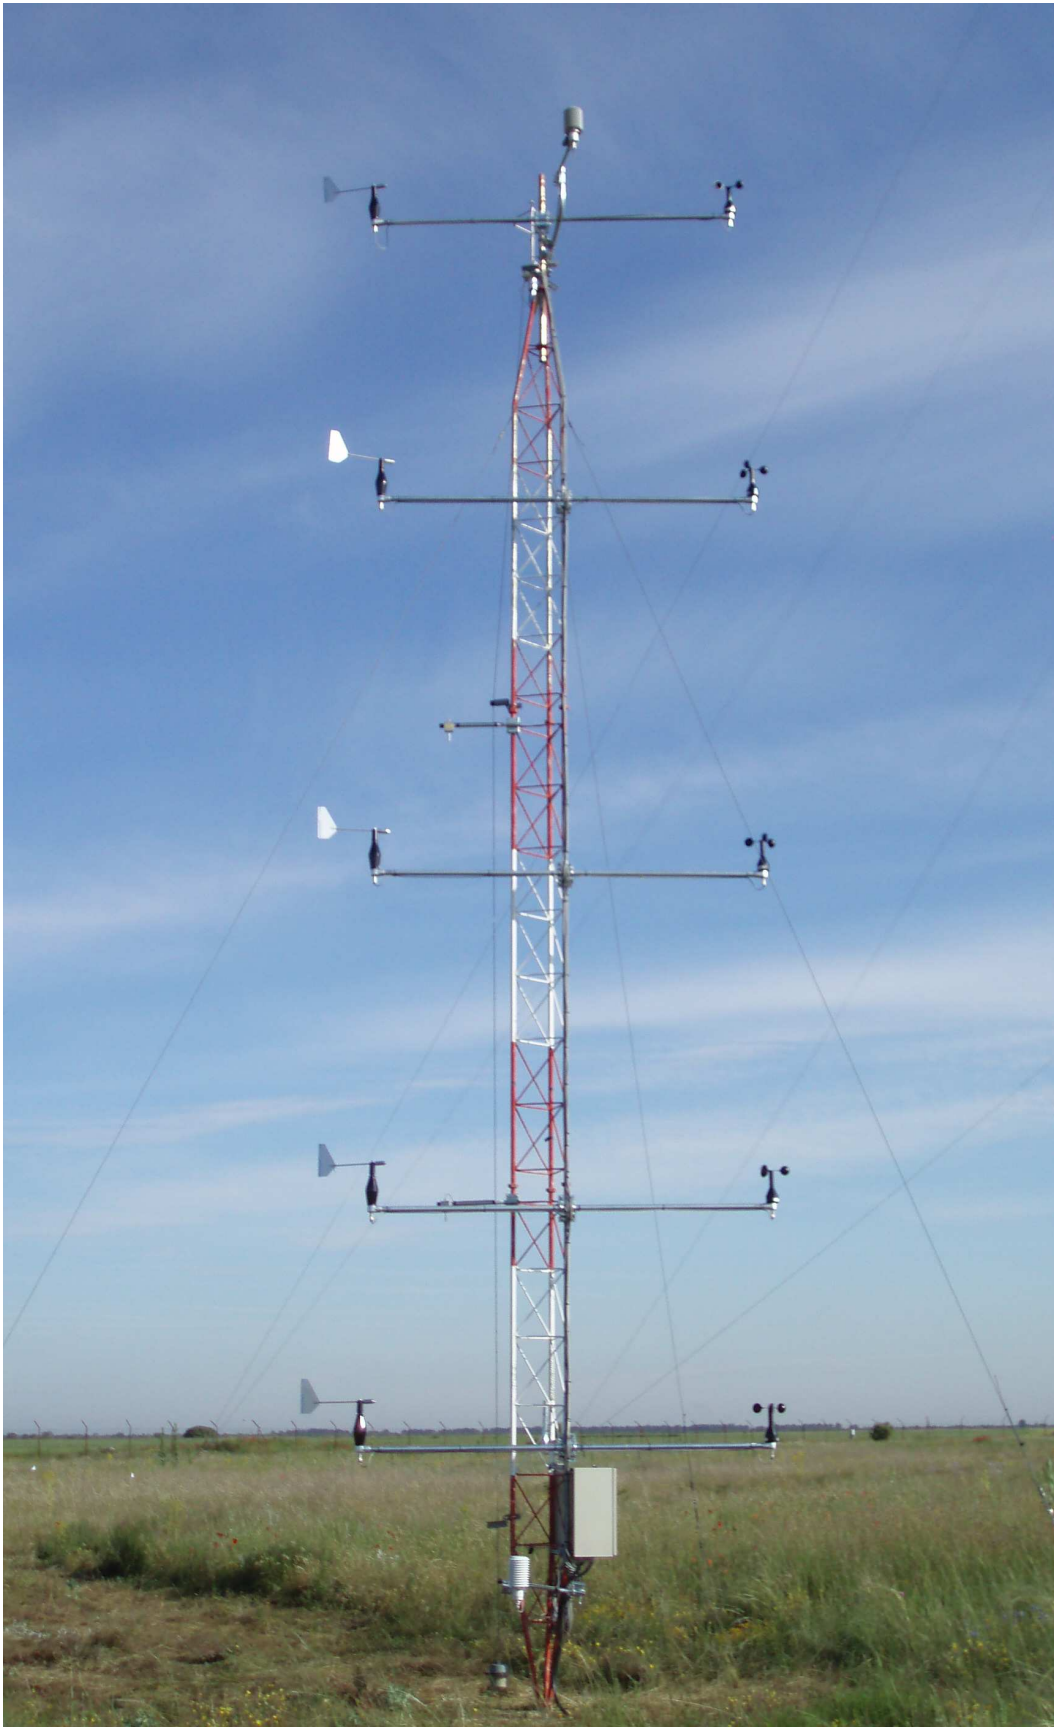

Figure 1: Picture of the 10m mast located at the CIBA site, with instrumentation at different levels.

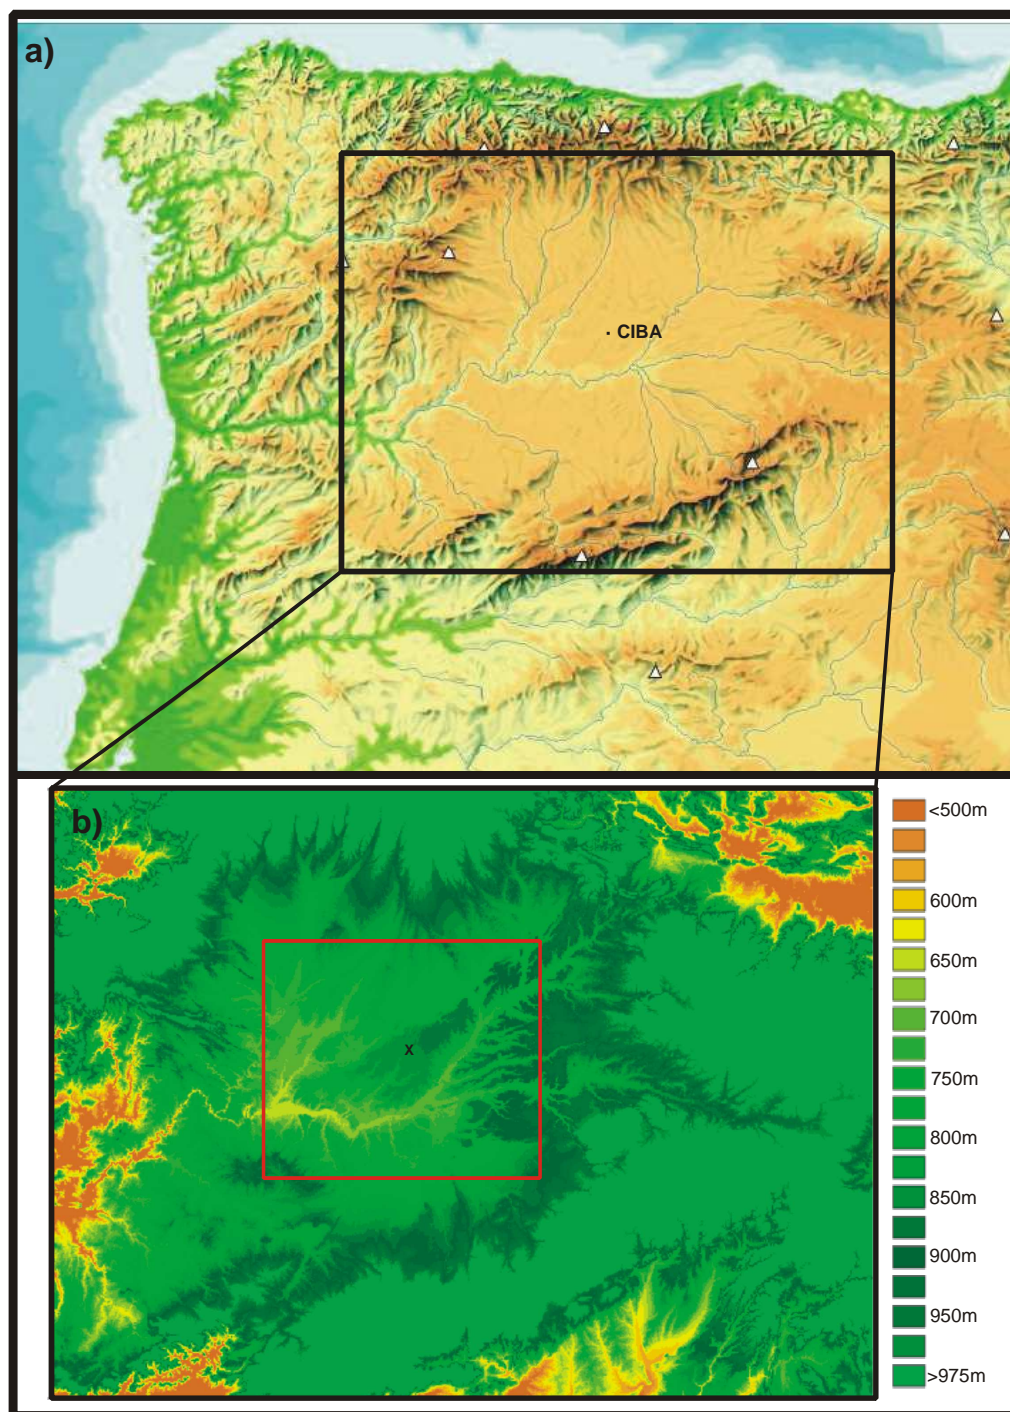

Figure 2: a) Location of the CIBA site in the Iberian Peninsula. b) Topographic map of the previous selected black rectangle.

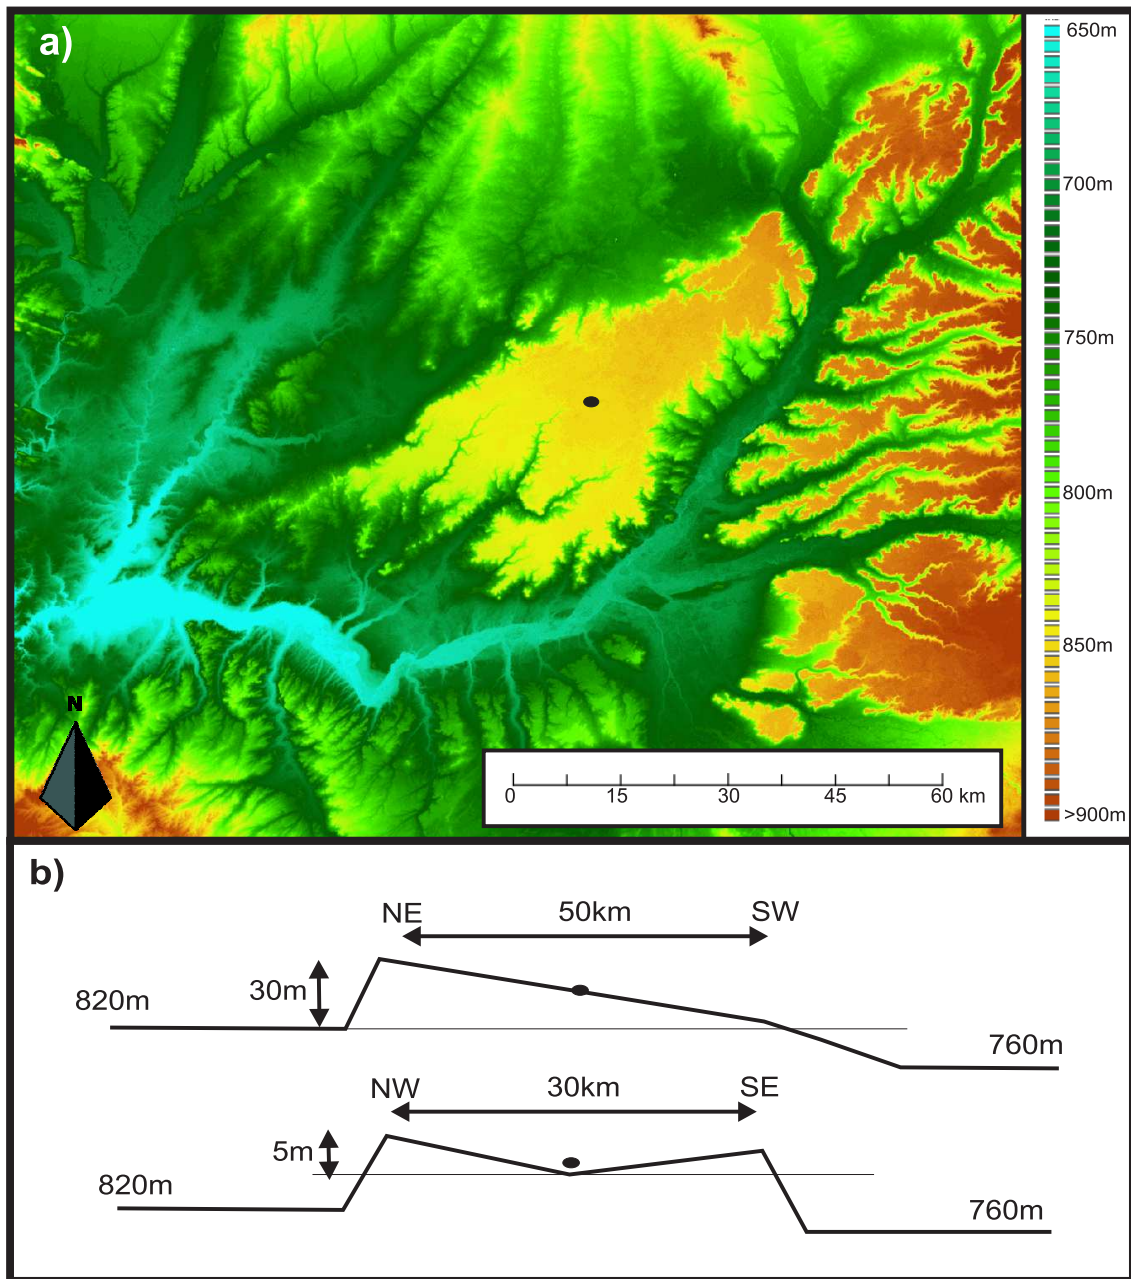

Figure 3: a) Topographic map of the area in the red rectangle in Fig. 2b. b) Schematic drawing of the small slopes at the CIBA.
