# Supplementary material for: Evening transitions of the atmospheric boundary layer: characterization, case studies and WRF simulations
Source: Copernicus journal article supplement (doi:10.5194/asr-8-39-2012), 2012-03-26
Supplement: Supplementary file 2 [file Supplemental Information 2.pdf › Supplemental Information 2.pdf]

## RMSE

|            |      |                                          |             |             |              |
|------------|------|------------------------------------------|-------------|-------------|--------------|
| 26/08/2009 |      | TIME (referred to sunset: tsunset=0) (h) |             |             |              |
| T_2m (°C)  |      | from -2 to 0                             | from 0 to 2 | from 2 to 4 | from -2 to 4 |
|            | MYJ  | 1,5498                                   | 1,8462      | 1,6319      | 1,6806       |
|            | QNSE | 2,1294                                   | 1,8975      | 1,4502      | 1,8473       |
|            | MYNN | 1,648                                    | 0,9875      | 1,3364      | 1,3512       |

|                               |      |                                          |             |             |              |
|-------------------------------|------|------------------------------------------|-------------|-------------|--------------|
| 28/08/2009                    |      | TIME (referred to sunset: tsunset=0) (h) |             |             |              |
| wind_10m (m s <sup>-1</sup> ) |      | from -2 to 0                             | from 0 to 2 | from 2 to 4 | from -2 to 4 |
|                               | MYJ  | 0,6578                                   | 0,8802      | 0,4673      | 0,6894       |
|                               | QNSE | 0,6799                                   | 1,0068      | 1,1494      | 0,9656       |
|                               | MYNN | 0,9742                                   | 0,6916      | 0,4635      | 0,7399       |

|                             |      |                                          |             |             |              |
|-----------------------------|------|------------------------------------------|-------------|-------------|--------------|
| 28/08/2009                  |      | TIME (referred to sunset: tsunset=0) (h) |             |             |              |
| U_star (m s <sup>-1</sup> ) |      | from -2 to 0                             | from 0 to 2 | from 2 to 4 | from -2 to 4 |
|                             | MYJ  | 0,0702                                   | 0,0756      | 0,078       | 0,0747       |
|                             | QNSE | 0,0837                                   | 0,1045      | 0,0335      | 0,0797       |
|                             | MYNN | 0,0627                                   | 0,0539      | 0,0506      | 0,056        |

|                             |      |                                          |             |             |              |
|-----------------------------|------|------------------------------------------|-------------|-------------|--------------|
| 30/08/2009                  |      | TIME (referred to sunset: tsunset=0) (h) |             |             |              |
| U_star (m s <sup>-1</sup> ) |      | from -2 to 0                             | from 0 to 2 | from 2 to 4 | from -2 to 4 |
|                             | MYJ  | 0,0868                                   | 0,055       | 0,1232      | 0,0926       |
|                             | QNSE | 0,0776                                   | 0,0436      | 0,1337      | 0,0928       |
|                             | MYNN | 0,0487                                   | 0,0538      | 0,1297      | 0,0858       |

## BIAS

|            |      |                                          |             |             |              |
|------------|------|------------------------------------------|-------------|-------------|--------------|
| 26/08/2009 |      | TIME (referred to sunset: tsunset=0) (h) |             |             |              |
| T_2m (°C)  |      | from -2 to 0                             | from 0 to 2 | from 2 to 4 | from -2 to 4 |
|            | MYJ  | -1,4926                                  | 1,1255      | 1,3189      | 0,3173       |
|            | QNSE | -1,9864                                  | -0,6671     | -0,3681     | -1,0072      |
|            | MYNN | -1,6099                                  | -0,2864     | -0,9854     | -0,9606      |

|                               |      |                                          |             |             |              |
|-------------------------------|------|------------------------------------------|-------------|-------------|--------------|
| 28/08/2009                    |      | TIME (referred to sunset: tsunset=0) (h) |             |             |              |
| wind_10m (m s <sup>-1</sup> ) |      | from -2 to 0                             | from 0 to 2 | from 2 to 4 | from -2 to 4 |
|                               | MYJ  | 0,2593                                   | 0,5405      | 0,225       | 0,3416       |
|                               | QNSE | 0,188                                    | 0,2897      | 1,0495      | 0,5091       |
|                               | MYNN | -0,69                                    | 0,2339      | -0,1787     | -0,2116      |

|                             |      |                                          |             |             |              |
|-----------------------------|------|------------------------------------------|-------------|-------------|--------------|
| 28/08/2009                  |      | TIME (referred to sunset: tsunset=0) (h) |             |             |              |
| U_star (m s <sup>-1</sup> ) |      | from -2 to 0                             | from 0 to 2 | from 2 to 4 | from -2 to 4 |
|                             | MYJ  | -0,0515                                  | -0,0491     | -0,0678     | -0,0562      |
|                             | QNSE | -0,0592                                  | -0,0684     | -0,0033     | -0,0437      |
|                             | MYNN | -0,0468                                  | 0,0052      | -0,0279     | -0,0232      |

|                             |      |                                          |             |             |              |
|-----------------------------|------|------------------------------------------|-------------|-------------|--------------|
| 30/08/2009                  |      | TIME (referred to sunset: tsunset=0) (h) |             |             |              |
| U_star (m s <sup>-1</sup> ) |      | from -2 to 0                             | from 0 to 2 | from 2 to 4 | from -2 to 4 |
|                             | MYJ  | -0,0497                                  | 0,0479      | -0,1102     | -0,0373      |
|                             | QNSE | -0,044                                   | 0,0337      | -0,1215     | -0,0439      |
|                             | MYNN | -0,0119                                  | 0,0452      | -0,1148     | 0,0926       |
